# Supplementary material for: Global Snow- and Ice-Related Disaster Risk: A Review
Source: Atypon-hosted journal article supplement (doi:10.1061/(asce)nh.1527-6996.0000584), 2022-09-09
Supplement: supplemental_material_nh.1527-6996.0000584_shijin.pdf [file supplemental_material_nh.1527-6996.0000584_shijin.pdf]

# SUPPLEMENTAL MATERIALS

*ASCE Natural Hazards Review*

## Global Snow- and Ice-Related Disaster Risk: A Review

Wang Shijin, Yang Yuande, and Che Yanjun

**DOI:** 10.1061/(ASCE)NH.1527-6996.0000584

© ASCE 2022

[www.ascelibrary.org](http://www.ascelibrary.org)

1 Supplemental Material Figure S1 Temporal and spatial scale of snow and ice-related disasters

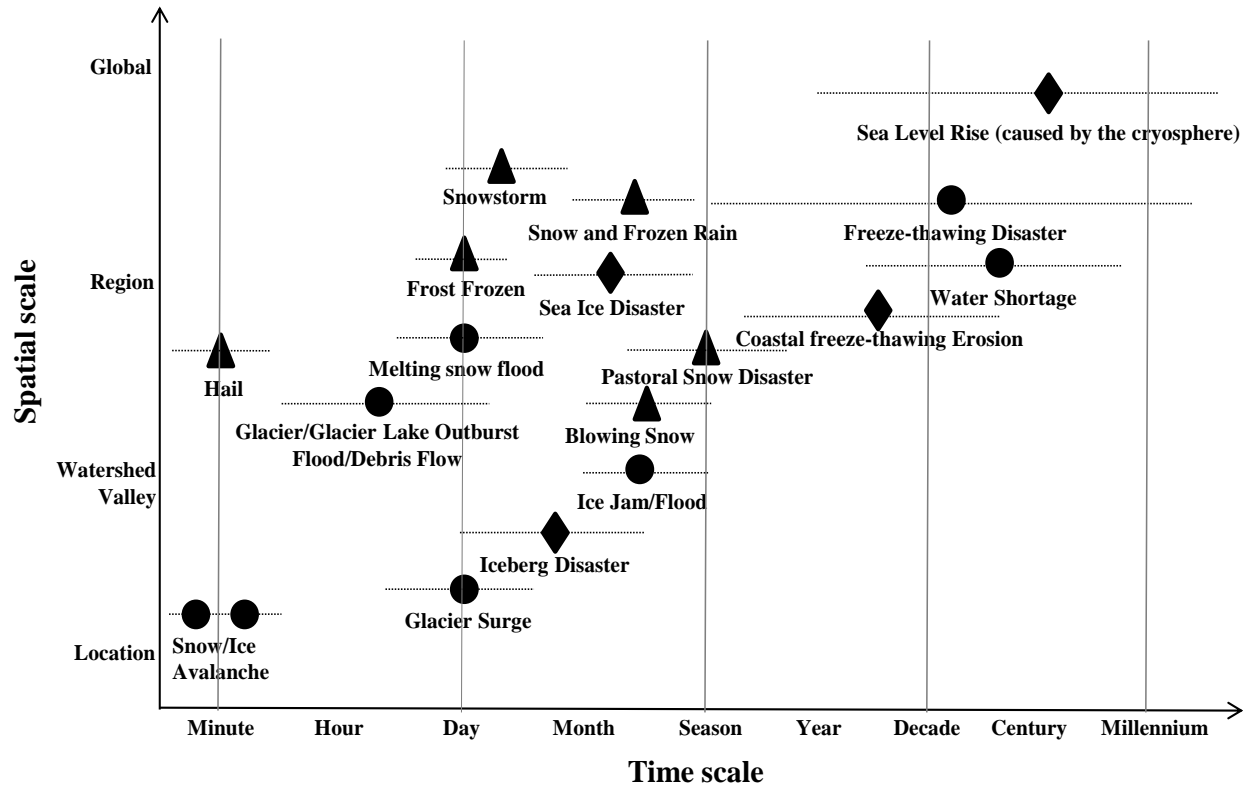

2

3 (Black dots, triangles and diamonds represent three types of disasters on land, on the ocean and in sky, respectively; Dotted line represents the duration of the  
4 disaster)

5

6 Supplemental Material Figure S2 Framework of snow and ice-related disasters prevention and response strategies

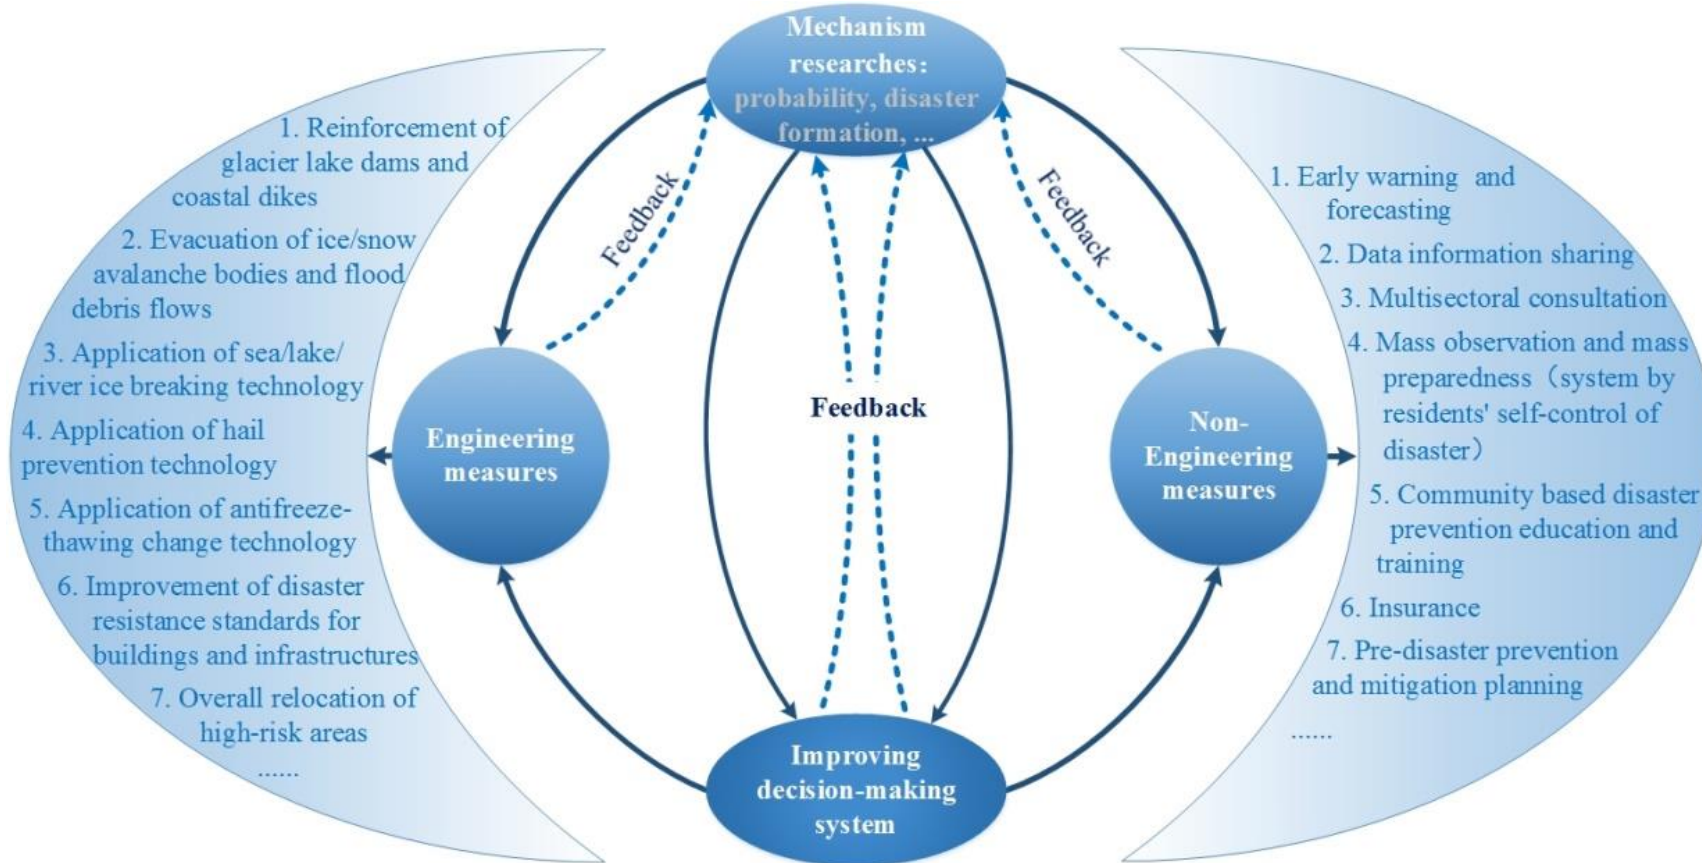

7  
8  
9  
10

11 **Supplemental Material Table S1 Snow and ice-related disasters on land and their triggering factors and main disaster-bearing bodies**

| Sub- disaster                                         | Triggering factors                                                                                             | Main disaster-bearing bodies                                                     | Examples                                                                                                                                                                                              | Sources                                                                                          |
|-------------------------------------------------------|----------------------------------------------------------------------------------------------------------------|----------------------------------------------------------------------------------|-------------------------------------------------------------------------------------------------------------------------------------------------------------------------------------------------------|--------------------------------------------------------------------------------------------------|
| Snowstorm disaster                                    | Short-term extreme snowfall event                                                                              | Transportation<br>Transportation<br>Housing                                      | Heavy Snowstorm Hits US, Prompts Mass Flight Cancellations in Chicago, Kansas in 2018                                                                                                                 | Zarzycki, 2018.                                                                                  |
| Freezing rain and snow disaster (including ice storm) | Icing on the disaster-bearing body during snow and freezing rain process                                       | Building construction<br>Transportation<br>Electric lines<br>Fruit industry      | Starting on January, 2008, tens of thousands of passengers were stranded on Beijing-Zhuhai Expressway due to freezing rain and snow weather.                                                          | Chen et al., 2011<br>Liu et al., 2013                                                            |
| Hail disaster                                         | Rapid and dense landing of small and medium ice particles (ice embryos) after encountering cold water droplets | Crops<br>Fruit industry<br>Vegetable industry<br>Agricultural products           | On April 25, 2019, Colorado holds the title of most costly state for hail damage in the U.S                                                                                                           | Wang et al., 2016<br>Gunturi and Tippett, 2017<br>Allen et al., 2019                             |
| Frost disaster                                        | When the temperature drops sharply in the autumn and winter, water vapor directly condenses on the object      | Crops<br>Fruit and fruit industry<br>Vegetable industry<br>Agricultural products | A frost event in Kenya in January 2012 caused a loss of about 9.6 million United States dollars                                                                                                       | Wang et al., 2016<br>Faustand Herbold, 2018<br>Cohen and Gninghaye, 2018<br>Kotikot et al., 2020 |
| Ice avalanche                                         | Large-scale ice masses sliding or landing or ice breaking off from the hanging glacier                         | Residents<br>Infrastructure                                                      | Deposits of the ice avalanche from Allalin glacier, which killed 88 workers at the construction site for the Mattmark dam (hydropower reservoir), Saas Valley, Southern Swiss Alps on August 30, 1965 | Schweizer et al., 2015<br>Shugar et al., 2021                                                    |
| Avalanche                                             | Large-scale snow (block) sliding or landing                                                                    | Alpine tourists<br>Infrastructure                                                | Avalanche at Walenstadt (Schattenbach), Switzerland                                                                                                                                                   | Haerberli et al., 2015, 2021<br>Ballesteros-Cánovas et al., 2018                                 |
| Glacier surge                                         | Rapid movement of glaciers caused by the interaction                                                           | Residents,                                                                       | Variegated Glacier, Alaska.                                                                                                                                                                           | Harrison et al., 2015;                                                                           |

|                           |                                                                                                                              |                                                                       |                                                                                                                                                           |                                                                            |
|---------------------------|------------------------------------------------------------------------------------------------------------------------------|-----------------------------------------------------------------------|-----------------------------------------------------------------------------------------------------------------------------------------------------------|----------------------------------------------------------------------------|
|                           | between rapid deformation of ground moraine hydrological processes under the ice                                             | Pastures<br>Infrastructure                                            |                                                                                                                                                           | Rashida et al., 2018                                                       |
| Pastoral snow disaster    | Deaths caused by snow cover and insufficient livestock feed                                                                  | Livestock<br>Residents                                                | From December 2018 to March 2019, 57,900 livestock has died because of the snow disaster, which leads to the direct economic losses of 0.192 billion CNY. | Wang et al., 2019a                                                         |
| Drifting or Blowing snow  | Weather events caused by strong winds in the snow area                                                                       | Road<br>Transportation                                                | Blowing snow off the road in the Mayetas area, Tacheng administration of the Xinjiang Uygur Autonomous Region, China (January 2013)                       | Nishimura et al., 2014                                                     |
| GLOF                      | Dam Break Flood caused by ice collapse, continuous precipitation, pipe surge, etc.                                           | Residents<br>Roads, Bridges<br>Infrastructure<br>Downstream residents | Lake Palcacocha, Peru, with two security dams in the foreground (dam on the left clearly damaged by 2003 lake overflow)                                   | Wang et al., 2015, 2020<br>Kougkoulos et al., 2018<br>Veh et al., 2020     |
| Glacier flood/debris flow | Melting/debris flow formed by melting glaciers, or accompanied by heavy rainfall, volcanic eruptions                         | Roads<br>Bridges<br>Power stations<br>Infrastructure                  | <i>The downstream area of Chorabari Glacier experienced flood/debris flow in Central Himalaya, India</i>                                                  | Shen et al., 2009<br>Petley, 2013                                          |
| Melting snow flood        | Spring flood formed by melting snow                                                                                          | Cultivated land<br>Downstream residents                               | <i>Snowmelt floods in Kazakhstan, April 2015.</i>                                                                                                         | Duan et al., 2018<br>Niedzielski et al., 2019                              |
| Ice jam/flood             | Ice blocks the river and raises the upstream water level; when thawing, the downstream water level rises and forms the flood | Water conservancy<br>Hydropower<br>Shipping                           | Ice-jam flooding, Ounasjoki River, Finland                                                                                                                | White et al., 2007<br>Lindenschmidt et al., 2018<br>Rokaya et al., 2018    |
| Freeze-thawing disaster   | Strong freezing and thawing effect                                                                                           | Road network<br>Pipe network<br>Wire network<br>Other infrastructure  | Potential risk of above-ground pipe network in the frozen soil area of Ice-rich coasts of North Yakutfu, Russia                                           | Streletskiy et al., 2015<br>Hjort et al., 2018<br>Farquharson et al., 2019 |

- 13 disasters, ice and snow debris flows-salting lakes (blocking the river), avalanche-landslides-blocking rivers, are omitted.
- 14 Cáceres B.E., 2016. Dramatical reduction of Cotopaxi Glaciers during the last volcano awakening 2015-2016. In: AGU Fall Meeting Abstracts.
- 15 Hemmings B., Whitaker F., Gottsmann J. et al. 2016. Non-eruptive ice melt driven by internal heat at glaciated stratovolcanoes. *J. Volcanol. Geotherm. Res.*, 327, 385–397.
- 16 Reinthaler J., Paul F., Granados H. et al. 2019. Area changes of glaciers on active volcanoes in Latin America between 1986 and 2015 observed from multi-temporal satellite imagery. *J. Glaciol.*, 65(252), 542–556.

17

18 **Supplemental Material Table S2 Snow and ice-related disasters on the ocean and their triggering factors and main disaster-bearing bodies**

| Sub- disaster               | Triggering factors                                                          | Main disaster-bearing bodies                                                                 | Examples                                                                                                             | Sources                                                                                 | 19<br>20<br>21             |
|-----------------------------|-----------------------------------------------------------------------------|----------------------------------------------------------------------------------------------|----------------------------------------------------------------------------------------------------------------------|-----------------------------------------------------------------------------------------|----------------------------|
| Iceberg disaster            | Iceberg moving with heavy fog                                               | Drilling platforms<br>Offshore residents<br>Facilities                                       | The village of Ilulissat in western Greenland is surrounded by icebergs that have calved from the Jakobshavn Glacier | Haerberli et al., 2015, 2021                                                            | 22<br>23<br>24             |
| Sea ice disaster            | Sea ice formation and disappearing, ice flotation, Ice shelf collapse, etc. | Ports<br>Harbor facilities<br>Drilling platforms<br>Navigation safety<br>Coastal aquaculture | CCG icebreaker freeing vessels beset in pressured ice, East Coast of Newfoundland in April 2007.                     | Haerberli et al., 2015, 2021                                                            | 25<br>26<br>27<br>28<br>29 |
| Coastal freeze-thaw erosion | Coastal collapse caused by freezing and thawing in permafrost regions       | Land<br>Coastal landscape<br>Buildings<br>Infrastructure                                     | The erosion and collapse of the Arctic permafrost coastal zone                                                       | AWI, 2013<br>Haerberli et al., 2015, 2021;<br>Fritz et al., 2017<br>Wright et al., 2019 | 30<br>31<br>32<br>33<br>34 |
| Sea level rise disaster     | Sea level rise caused by melting of glaciers                                | Homeland security<br>Infrastructure<br>Land area                                             | Male, Maldives                                                                                                       | Muis et al., 2016<br>Wahl et al., 2017                                                  | 35<br>36<br>37             |

38

39 **Reference**

- 40 Allen J.T., Giammanco I.M., Kumjian M.N., et al. 2019. Understanding Hail in the Earth System. *Rev. Geophys.*, 58(1): doi:  
41 10.1029/2019RG000665.
- 42 AWI. 2013. Thawing permafrost: the speed of coastal erosion in Eastern Siberia has nearly doubled. <http://www.awi.de/en/news/>
- 43 Ballesteros-Cánovas J.A., Trappmann D., Madrigal-González J., et al. 2018. Climate Warming Enhances Snow Avalanche Risk in the Western  
44 Himalayas. *PNAS*, 115: 201716913.
- 45 Chen Q.L., Li Z., Fan G.Z., et al. 2011. Indications of stratospheric anomalies in the freezing rain and snow disaster in South China, 2008. *Sci*  
46 *China Earth Sci*, 54(8): 1248-1256.
- 47 Cohen L. and Gninghayé D. 2018. Modeling the risk of frost in France, ENSAE Paris Tech.
- 48 Duan Y.C., Liu T., Meng F.H., et al. 2018. Inclusion of Modified Snow Melting and Flood Processes in the SWAT Model. *Water*, 10: 1715.
- 49 Eberhard Faust E., Herbold J. 2018. Spring frost losses and climate change-Not a contradiction in terms. *Munich Re.* <https://www.munichre.com/>.
- 50 ECMIAK (Emergency Committee of the Ministry of Internal Affairs in Kazakhstan). 2015. Kazakhstan-15,000 Evacuated as Melting Snow  
51 Causes Floods in 4 Regions. <http://floodlist.com/asia/Kazakhstan>.
- 52 Fritz M., Vonk J.E., and Lantuit H. 2017. Collapsing Arctic coastlines. *Nat. Clim. Change*, 5: 6–7.
- 53 Gunturi P. and Tippett M. K. 2017. Managing severe thunderstorm risk: Impact of ENSO on U.S. tornado and hail frequencies, Tech. rep.,  
54 WillisRe.
- 55 Haerberli W. et al. 2021. *Snow and Ice-Related Hazards, Risks, and Disasters (Second Edition)*. Elsevier.
- 56 Haerberli W., Whiteman C., Shroder J.F. 2015. *Snow and Ice-related Hazards, Risks, and Disasters*. Elsevier, pp. 677-712.

57 Harrison W.D., Osipova G.B., Nosenko G.A. 2015. Glacier Surges//Haerberli W., Whiteman C. (Eds.). Snow and Ice-related Hazards, Risks and  
58 Disasters. Elsevier, pp. 437-485.

59 Hjort J., Karjalainen Q., Aalto J., et al. 2018. Degrading permafrost puts Arctic infrastructure atrisk by mid-century. Nat. Commun., 9: 5147.

60 Kotikot S.M., Flores A., Griffin R.E., et al. 2020. Statistical characterization of frost zones: Case of tea freeze damage in the Kenyan highlands. Int  
61 J Appl Earth Obs Geoinformation, 84: 101971. doi.org/10.1016/j.jag.2019.101971.

62 Kougkoulos I., Cook S.J., Jomelli V., et al. 2018. Use of multi-criteria decision analysis to identify potentially dangerous glacial lakes. Sci. Total  
63 Environ., 621: 1453.

64 Lindenschmidt K.E., Huokuna M., Burrell B.C., et al. 2018. Lessons learned from past ice-jam floods concerning the challenges of flood mapping.  
65 Int J River Basin Manag, DOI: 10.1080/15715124.2018.1439496.

66 Liu X., Gao A., Zhao J. 2013. Characteristics and causation of the freezing rain and snow disaster in western south China in 2011. J Nat Disast,  
67 22(6): 232-239.

68 Muis S., Verlaan M., Winsemius H.C., et al. 2016. A global reanalysis of storm surges and extreme sea levels. Nat. Commun., 7: 11969.

69 Niedzielski T., Szymanowski M., Miziński B., et al. 2019. Estimating snow water equivalent using unmanned aerial vehicles for determining  
70 snowmelt runoff. J Hydrol, 578: 124046.

71 Nishimura K., Yokoyama C., Ito Y., et al. 2014. Snow particle speeds in drifting snow. J Geophys Res: Atmos, 119, 9901-9913.

72 Petley D. 2013. More photographs of the aftermath of the Kedarnath debris flow disaster. <https://thegenerator.news/>.

73 Rashida I., Abdullaha T., Glasser N.F., et al. 2018. Surge of Hispar Glacier, Pakistan, between 2013 and 2017 detected from remote sensing



74 observations. *Geomorphology*, 303: 410-416.

75 Rokaya P., Budhathoki S., Lindenschmidt K.E. 2018. Trends in the Timing and Magnitude of Ice-Jam Floods in Canada. *Scientific Reports*, 8:  
76 5834.

77 Schweizer J., Bartelt P., Herwijnen A. 2015. *Snow Avalanches*//Haeberli W., Whiteman C., Shroder J.F. *Snow and Ice-related Hazards, Risks and*  
78 *Disasters*. Elsevier, pp. 677-712.

79 Shugar D.H., Jacquemart M., Shean D. et al. 2021. A massive rock and ice avalanche caused the 2021 disaster at Chamoli, Indian Himalaya.  
80 *Science*, 10.1126/science.abh4455.

81 Streletskiy D. A., Anisimov O., Vasiliev A. 2015. Permafrost Degradation. In: *Snow and Ice-Related Hazards, Risks and Disasters*, 303-344.

82 Veh G., Korup O., Walz A. 2020. Hazard from Himalayan glacier lake outburst floods. *PNAS*, 117(2): 907-912.

83 Wahl T., Haigh I.D., Nicholls R.J., et al. 2017. Understanding extreme sea levels for broad-scale coastal impact and adaptation analysis. *Nat.*  
84 *Commun.*, 8: 16075.

85 Wang J.A., Yue Y.J., Zhao J.T., et al. 2016. Snow, Frost, and Hail Disasters in China. In: Shi P.J. *Natural Disasters in China*, Elsevier, 187-237.

86 Wang S.J., Che Y.J., Ma X.G. 2020. Integrated risk assessment of glacier lake outburst flood (GLOF) disaster over the Qinghai-Tibetan plateau  
87 (QTP). *Landslides*, 17(12), 2849-2863.

88 Wang S.J., Zhou L.Y., Wei Y.Q. 2019a. Integrated Risk Assessment of Snow Disaster (SD) over the Qinghai-Tibetan Plateau (QTP). *Geomat Nat*  
89 *Haz Risk*, 10(1): 740-757.

90 White K.D., Tuthill A.M., Furman L. 2007. Studies of ice jam flooding in the united. In: *Proceedings of conference on extreme hydrological*

- 91 events: new concepts for security, 11–15 July 2005 Novosibirsk, Russia. Dordrecht: Springer.
- 92 Wright L.D., Wei W., Morris J. 2019. Coastal Erosion and Land Loss: Causes and Impacts. 10.1007/978-3-319-75453-6 (Chapter 9): 137-150.
- 93 Zarzycki C.M. 2018. Projecting Changes in Societally Impactful Northeastern U.S. Snowstorms. *Geophys. Res. Lett.*, 45(5): 2067-2075.
- 94 Zemp M., Huss M., Thibert E., et al. 2019. Global glacier mass changes and their contributions to sea-level rise from 1961 to 2016. *Nature*,
- 95 568(18): 382-386.
- 96
- 97
